# Supplementary material for: A lipidomic workflow capable of resolving sn- and CC location isomers of phosphatidylcholines
Source: Royal Society of Chemistry journal article supplement (doi:10.1039/c9sc03521d), 2019-01-01
Supplement: c9sc03521d2.xlsx [file c9sc03521d2.xlsx]

## Sheet: Sub-class species
Ion mode	Adduct	Obtained m/z	Chemical formula	Species
-	+HCO3-	766	C38H76NO8P	PC 30:0
-	+HCO3-	780	C39H78NO8P	PC 31:0
-	+HCO3-	790	C40H76NO8P	PC 32:2
-	+HCO3-	792	C40H78NO8P	PC 32:1
-	+HCO3-	794	C40H80NO8P	PC 32:0
-	+HCO3-	804	C41H78NO8P	PC 33:2
-	+HCO3-	806	C41H80NO8P	PC 33:1
-	+HCO3-	808	C41H80NO8P	PC 33:0
-	+HCO3-	816	C42H78NO8P	PC 34:3
-	+HCO3-	818	C42H80NO8P	PC 34:2
-	+HCO3-	820	C42H82NO8P	PC 34:1
-	+HCO3-	822	C42H84NO8P	PC 34:0
-	+HCO3-	832	C43H82NO8P	PC O-36:2/P-36:1
-	+HCO3-	834	C43H84NO8P	PC 35:1
-	+HCO3-	836	C43H84NO8P	PC 35:0
-	+HCO3-	842	C44H80NO8P	PC 36:4
-	+HCO3-	844	C44H82NO8P	PC 36:3
-	+HCO3-	846	C44H84NO8P	PC 36:2
-	+HCO3-	848	C44H86NO8P	PC 36:1
-	+HCO3-	850	C44H88NO8P	PC 36:0
-	+HCO3-	860	C45H86NO8P	PC O-38:2/P-38:1
-	+HCO3-	862	C45H88NO8P	PC 37:1
-	+HCO3-	868	C46H82NO8P	PC 38:5
-	+HCO3-	870	C46H84NO8P	PC 38:4
-	+HCO3-	872	C46H86NO8P	PC 38:3
-	+HCO3-	874	C46H88NO8P	PC 38:2
-	+HCO3-	894	C48H84NO8P	PC 40:6
-	+HCO3-	896	C48H86NO8P	PC 40:5
-	+HCO3-	898	C48H88NO8P	PC 40:4
-	+HCO3-	900	C48H90NO8P	PC 40:3

## Sheet: PC molecular species
Ion mode	Adduct	Precursor m/z	Fragment m/z	Structure with chain composition
-	+HCO3-	766	227, 255	PC 14:0_16:0
			249	PC 15:0_15:0
-	+HCO3-	780	227269	PC 14:0_17:0
			241255	PC 15:0_16:0
-	+HCO3-	790	227279	PC 14:0_18:2
			253	PC 16:1_16:1
-	+HCO3-	792	227281	PC 14:0_18:1
			253255	PC 16:0_16:1
-	+HCO3-	794	255	PC 16:0_16:0
-	+HCO3-	804	241279	PC 15:0_18:2
-	+HCO3-	806	241281	PC 15:0_18:1
			255267	PC 16:0_17:1
			253269	PC 16:1_17:0
-	+HCO3-	808	241283	PC 15:0_18:0
			255269	PC 16:0_17:0
-	+HCO3-	816	253279	PC 16:1_18:2
			255277	PC 16:0_18:3
-	+HCO3-	818	255279	PC 16:0_18:2
			253281	PC 16:1_18:1
-	+HCO3-	820	255281	PC 16:0_18:1
-	+HCO3-	822	255283	PC 16:0_18:0
-	+HCO3-	832
-	+HCO3-	834	255295	PC 16:0_19:1
			267283	PC 17:1_18:0
			269281	PC 17:0_18:1
-	+HCO3-	836	255297	PC 16:0_19:0
			269283	PC 17:0_18:0
-	+HCO3-	842	255303	PC 16:0_20:4
			279	PC 18:2_18:2
-	+HCO3-	844	255305	PC 16:0_20:3
			283277	PC 18:0_18:3
			281279	PC 18:1_18:2
-	+HCO3-	846	283279	PC 18:0_18:2
			281	PC 18:1_18:1
-	+HCO3-	848	283281	PC 18:0_18:1
			255309	PC 16:0_20:1
-	+HCO3-	850	283	PC 18:0_18:0
-	+HCO3-	860
-	+HCO3-	862	281297	PC 18:1_19:0
			283295	PC 18:0_19:1
-	+HCO3-	868	255329	PC 16:0_22:5
			281303	PC 18:1_20:4
			283301	PC 18:0_20:5
-	+HCO3-	870	255331	PC 16:0_22:4
			283303	PC 18:0_20:4
			281305	PC 18:1_20:3
-	+HCO3-	872	283305	PC 18:0_20:3
-	+HCO3-	874	283307	PC 18:0_20:2
-	+HCO3-	894	283327	PC 18:0_22:6
			281329	PC 18:1_22:5
-	+HCO3-	896	283329	PC 18:0_22:5
-	+HCO3-	898	283331	PC 18:0_22:4
-	+HCO3-	900	283333	PC 18:0_22:3

## Sheet: sn position
Ion mode	Adduct	Precursor (m/z)	sn-1 spec. ion (m/z)	chain position information	C=C
-	+HCO3-	766	391	PC 14:0/16:0
			419	PC 16:0/14:0
			405	PC 15:0/15:0
-	+HCO3-	780	391	PC 14:0/17:0
			433	PC 17:0/14:0
			405	PC 15:0/16:0
			419	PC 16:0/15:0
-	+HCO3-	790	391	PC 14:0/18:2
			417	PC 16:1/16:1
-	+HCO3-	792	391	PC 14:0/18:1
			419	PC 16:0/16:1
			417	PC 16:1/16:0
-	+HCO3-	794	419	PC 16:0/16:0
-	+HCO3-	804	405	PC 15:0/18:2
-	+HCO3-	806	405	PC 15:0/18:1
			445	PC 18:1/15:0
			419	PC 16:0/17:1
			431	PC 17:1/16:0
			417	PC 16:1/17:0
			433	PC 17:0/16:1
-	+HCO3-	808	405	PC 15:0/18:0
			447	PC 18:0/15:0
			419	PC 16:0/17:0
			433	PC 17:0/16:0
-	+HCO3-	816	417	PC 16:1/18:2
			417	PC 16:0/18:3
-	+HCO3-	818	419	PC 16:0/18:2
			443	PC 18:2/16:0
			417	PC 16:1/18:1
-	+HCO3-	820	419	PC 16:0/18:1	PC 16:0/18:1(∆9)
					PC 16:0/18:1(∆11)
			445	PC 18:1/16:0	PC 18:1/16:0(∆9)
					PC 18:1/16:0(∆11)
-	+HCO3-	822	419	PC 16:0/18:0
			447	PC 18:0/16:0
-	+HCO3-	832
-	+HCO3-	834	419	PC 16:0/19:1	PC 16:0/19:1(∆9）
					PC 16:0/19:1(∆11）
			447	PC 18:0/17:1	PC 18:0/17:1(∆9）
					PC 18:0/17:1(∆11）
			433	PC 17:0/18:1	PC 17:0/18:1(∆9）
					PC 17:0/18:1(∆11）
			445	PC 18:1/17:0	PC 18:1(∆9)/17:0
					PC 18:1(∆11)/17:0
-	+HCO3-	836	419	PC 16:0/19:0
			433	PC 17:0/18:0
			447	PC 18:0/17:0
-	+HCO3-	842	419	PC 16:0/20:4
			467	PC 20:4/16:0
			443	PC 18:2/18:2
-	+HCO3-	844	419	PC 16:0/20:3
			447	PC 18:0/18:3
			445	PC 18:1/18:2
			443	PC 18:2/18:1
-	+HCO3-	846	447	PC 18:0/18:2	PC 18:0/18:2(∆6,∆9）
					PC 18:0/18:2(∆9,∆12）
			445	PC 18:1/18:1
-	+HCO3-	848	447	PC 18:0/18:1	PC 18:0/18:1(∆9）
					PC 18:0/18:1(∆11）
			445	PC 18:1/18:0	PC 18:1(∆9)/18:0
					PC 18:1(∆11)/18:0
			419	PC 16:0/20:1
-	+HCO3-	850	447	PC 18:0/18:0
-	+HCO3-	860
-	+HCO3-	862	461	PC 19:0/18:1	PC 19:0/18:1(∆9）
					PC 19:0/18:1(∆11）
			447	PC 18:0/19:1
-	+HCO3-	868	419	PC 16:0/22:5
			445	PC 18:1/20:4
			447	PC 18:0/20:5
-	+HCO3-	870	419	PC 16:0/22:4
			447	PC 18:0/20:4
			445	PC 18:1/20:3
-	+HCO3-	872	447	PC 18:0/20:3
-	+HCO3-	874	447	PC 18:0/20:2
-	+HCO3-	894	447	PC 18:0/22:6
			445	PC 18:1/22:5
-	+HCO3-	896	447	PC 18:0/22:5	PC 18:0_22:5(∆7,∆10,∆13,∆16,∆19)
					PC 18:0_22:5(∆4,∆7,∆10,∆13,∆16)
				PC 22:5/18:0	PC 22:5_18:0(∆7,∆10,∆13,∆16,∆19)
			493		PC 22:5_18:0(∆4,∆7,∆10,∆13,∆16)
-	+HCO3-	898	447	PC 18:0/22:4
			495	PC 22:4/18:0
-	+HCO3-	900	447	PC 18:0/22:3

## Sheet: C=C position
Ion mode	Adduct	Precursor m/z	C=C diagnostic ions (m/z)	C=C postion information
+	+H+	764
+	+H+	778
+	+H+	788	622648	PC 14:0_18:1(∆9)
			650676	PC 16:0_16:1(∆9)
+	+H+	790
+	+H+	792
+	+H+	802
+	+H+	804	636662	PC 15:0_18:1(∆9)
			650676	PC 16:0_17:1(∆9)
			664690	PC 16:1(∆9)_17:0
+	+H+	806
+	+H+	814	648,674&688,714	PC 16:1_18:2(∆9,∆12)
			650,676&690,716&730,756	PC 16:0_18:3(∆9,∆12,∆15)
+	+H+	816	650,676&690,716	PC 16:0_18:2(∆9,∆12)
			648,674&676,702	PC 16:1(∆9)_18:1(∆9)
+	+H+	818	650676/678,704	PC 16:0_18:1(∆9)	PC 16:0_18:1(∆11)
+	+H+	820
+	+H+	830	650,676&690,716	PC 16:0_19:2(∆9,∆12)
			662,688&676,702	PC 17:1(∆9)_18:1(∆9)
			664,690&704,730	PC 17:0_18:2(∆9,∆12)
+	+H+	832	650676/678,704	PC 16:0_19:1(∆9)	PC 16:0_19:1(∆11)
			678,704/706,732	PC 17:1(∆9)_18:0	PC 17:1(∆11)_18:0
			664,690/692,718	PC 17:0_18:1(∆9)	PC 17:0_18:1(∆11)
+	+H+	834
+	+H+	840	594,620&634,660&674,700&714,740	PC 16:0_20:4(∆5,∆8,∆11,∆14)
+	+H+	842	636,662&676,702&716,742	PC 16:0_20:3(∆8,∆11,∆14)
			636,662&676,702&716,742	PC 18:0_18:3(∆6,∆9,∆12)
+	+H+	844	636,662&676,702/664,690&704,730/678,704&718,744	PC 18:0_18:2(∆6,∆9)	PC 18:0_18:2(∆9,∆12)	PC 18:0_18:2(∆8,∆11)
+	+H+	846	678,704/706,732	PC 18:0_18:1(∆9)	PC 18:0_18:1(∆11)
+	+H+	848
+	+H+	858	678,704&718,744	PC 18:0_19:2(∆9,∆12)
			692,718&732,758	PC 17:0_20:2(∆11,∆14)
			692,718&732,758	PC 19:0_18:2(∆9,∆12)
			718,744&676,702	PC 19:1(∆9)_18:1(∆9)
+	+H+	860	692,718/720,746/734,760	PC 19:0/18:1(∆9)	PC 19:0/18:1(∆11)	PC 19:0/18:1(∆12)
			678704	PC 18:0/19:1(∆9)
+	+H+	866	622,648&662,688&702,728&742,768&782,808	PC 16:0/22:5(∆7,∆10,∆13,∆16,∆19)
			620,646&660,686&700,726&740,766	PC 18:1/20:4(∆5,∆8,∆11,∆14)
			622,648&662,688&702,728&742,768&782,808	PC 18:0/20:5(∆5,∆8,∆11,∆14,∆17)
+	+H+	868	622,648&662,688&702,728&742,768	PC 16:0/22:4(∆7,∆10,∆13,∆16)
			622,648&662,688&702,728&742,768	PC 18:0/20:4(∆5,∆8,∆11,∆14)
+	+H+	870	664,690&704,730&744,770	PC 18:0/20:3(∆8,∆11,∆14)
+	+H+	872	664,690&704,730/706,732&746,772	PC 18:0/20:2(∆8,∆11)	PC 18:0/20:2(∆11,∆14)
+	+H+	882
+	+H+	892		PC 18:0/22:6(∆4,∆7,∆10,∆13,∆16,∆19)
+	+H+	894	650,676&690,716&730,756&770,796&810,836/608,648,688	PC 18:0_22:5(∆7,∆10,∆13,∆16,∆19)	PC 18:0_22:5(∆4,∆7,∆10,∆13,∆16)
+	+H+	896	650,676&690,716&730,756&770,796	PC 18:0_22:4(∆7,∆10,∆13,∆16)
+	+H+	898	594,620&634,660&674,700/692,718&732,758&772,798	PC 18:0/22:3(∆10,∆13,∆16)	PC 20:0/20:3(∆3,∆6,∆9)
