# Supplementary material for: A lipidomic workflow capable of resolving sn- and CC location isomers of phosphatidylcholines
Source: Royal Society of Chemistry journal article supplement (doi:10.1039/c9sc03521d), 2019-01-01
Supplement: c9sc03521d3.xlsx [file c9sc03521d3.xlsx]

## Sheet: normal
NORMAL BREAST TISSUE
PC	[M+HCO3]-	PB product	fatty acyl	sn related ion	sn isomer	relative intensity
PC 31:2	776	774
PC 31:1	778	776
PC 31:0	780	-	PC 15:0_16:0	405	PC 15:0/16:0	0.79
				419	PC 16:0/15:0	0.21
PC 32:2	790	788	PC 14:0_18:2
			PC 16:0_16:2
			PC 16:1_16:1
PC 32:1	792	790	PC 14:0_18:1	391	PC 14:0/18:1	0.75
				445	PC 18:1/14:0	0.25
			PC 16:0_16:1	417	PC 16:1/16:0	0.46
				419	PC 16:0/16:1	0.54
PC 32:0	794	-	PC 16:0_16:0	419	PC 16:0/16:0
PC 33:2	804	802	PC 15:0_18:2	405	PC 15:0/18:2
			PC 15:1_18:1	403	PC 15:1/18:1	0.51
				445	PC 18:1/15:1	0.49
			PC 16:1_17:1	417	PC 16:1/17:1	0.25
				431	PC 17:1/16:0	0.75
PC 33:1	806	804	PC 15:0_18:1	405	PC 15:0/18:1	0.81
				445	PC 18:1/15:0	0.19
			PC 16:0_17:1	419	PC 16:0/17:1	0.09
				431	PC 17:1/16:0	0.91
PC 33:0	808	-	PC 15:0_18:0	405	PC 15:0/18:0	0.44
				447	PC 18:0/15:0	0.56
			PC 16:0_17:0	419	PC 16:0/17:0	0.16
				433	PC 17:0/16:0	0.84
PC 34:3	816	814	PC 16:1_18:2	417	PC 16:1/18:2	0.71
				443	PC 18:2/16:1	0.29
			PC 16:0_18:3	419	PC 16:0/18:3	0.58
				441	PC 18:3/16:0	0.42
PC 34:2	818	816	PC 16:0_18:2	419	PC 16:0/18:2	0.67
				443	PC 18:2/16:0	0.33
			PC 16:1_18:1	417	PC 16:1/18:1	0.56
				445	PC 18:1/16:1	0.44
PC 34:1	820	818	PC 16:0_18:1	419	PC 16:0/18:1	0.59
				445	PC 18:1/16:0	0.41
PC 34:0	822	-	PC 16:0_18:0	419	PC 16:0/18:0	0.15
				447	PC 18:0/16:0	0.85
PC 35:5	826	824
PC 35:4	828	826
PC 35:3	830	828
PC 35:2	832	830	PC 16:0_19:2	419	PC 16:0/19:2	1
			PC 17:1_18:1	431	PC 17:1/18:1	0.89
				445	PC 18:1/17:1	0.11
			PC 17:0_18:2	433	PC 17:0/18:2	0.88
				443	PC 18:2/17:0	0.12
PC 35:1	834	832	PC 16:0_19:1	419	PC 16:0/19:1	0.38
				459	PC 19:1/16:0	0.62
			PC 17:1_18:0	447	PC 18:0/17:1	1
			PC 17:0_18:1	433	PC 17:0/18:1	0.8
				445	PC 18:1/17:0	0.2
PC 35:0	836	-	PC 16:0_19:0	419	PC 16:0/19:0	0.41
				461	PC 19:0/16:0	0.59
			PC 17:0_18:0	447	PC 18:0/17:0	0.72
				433	PC 17:0/18:0	0.28
PC 36:5	840	838
PC 36:4	842	840	PC 16:0_20:4	419	PC 16:0/20:4	0.93
				467	PC 20:4/16:0	0.07
			PC 18:2_18:2	443	PC 18:2/18:2	1
PC 36:3	844	842	PC 16:0_20:3	419	PC 16:0/20:3	1
			PC 18:1_18:2	445	PC 18:1/18:2	0.81
				443	PC 18:2/18:1	0.19
PC 36:2	846	844	PC 16:0_20:2	419	PC 16:0/20:2	0.67
				471	PC 20:2/16:0	0.33
			PC 18:0_18:2	447	PC 18:0/18:2	1
			PC 18:1_18:1	445	PC 18:1/18:1	1
PC 36:1	848	846	PC 18:0_18:1	447	PC 18:0/18:1
			PC 16:0_20:1	419	PC 16:0/20:1	0.3
				473	PC 20:1/16:0	0.7
PC 36:0	850	-	PC 18:0_18:0	447	PC 18:0/18:0	1
PC 37:6	852	820
PC 37:5	854	852
PC 37:4	856	854
PC 37:3	858	856
PC 37:2	860	858	PC 17:0_20:2	433	PC 17:0/20:2	1
			PC 19:0_18:2	461	PC 19:0/18:2	1
			PC 19:1_18:1	459	PC 19:1/18:1	0.69
				445	PC 18:1/19:1	0.31
PC 37:1	862	860	PC 18:1_19:0	461	PC 19:0/18:1	0.58
				445	PC 18:1/19:0	0.42
			PC 18:0_19:1	447	PC 18:0/19:1	1
PC 38:6	866	864	PC 16:0_22:6	419	PC 16:0/22:6	1
			PC 18:2_20:4	443	PC 18:2/20:4	1
PC 38:5	868	866	PC 16:0_22:5	419	PC 16:0/22:5	1
			PC 18:1_20:4	445	PC 18:1/20:4	1
PC 38:4	870	868	PC 16:0_22:4	419	PC 16:0/22:4	1
			PC 18:0_20:4	447	PC 18:0/20:4	1
PC 38:3	872	870	PC 18:0_20:3	447	PC 18:0/20:3	1
PC 38:2	874	872	PC 18:0_20:2	447	PC 18:0/20:2	1
PC 38:1	876	-
PC 40:7	892	890
PC 40:6	894	892	PC 18:0_22:6	447	PC 18:0/22:6	1
			PC 20:2_20:4	471	PC 18:1/22:5	1
PC 40:5	896	894	PC 18:0_22:5	447	PC 18:0/22:5	1
			PC 18:1_22:4	445	PC 18:1/22:4	1
			PC 20:1_20:4	473	PC 20:1/20:4	1
PC 40:4	898	896	PC 18:0_22:4	447	PC 18:0/22:4	1
PC 40:3	900	898

## Sheet: cancer
CA
PC	[M+HCO3]-	PB product	fatty acyl	sn related ion	sn isomer	relative intensity
PC 31:2	776	774
PC 31:1	778	776
PC 31:0	780	-	PC 15:0_16:0	405	PC 15:0/16:0	0.67
				419	PC 16:0/15:0	0.33
PC 32:2	790	788	PC 14:0_18:2
			PC 16:0_16:2
			PC 16:1_16:1
PC 32:1	792	790	PC 14:0_18:1	391	PC 14:0/18:1	0.82
				445	PC 18:1/14:0	0.18
			PC 16:0_16:1	417	PC 16:1/16:0	0.15
				419	PC 16:0/16:1	0.75
PC 32:0	794	-	PC 16:0_16:0	419	PC 16:0/16:0	1
PC 33:2	804	802	PC 15:0_18:2	405	PC 15:0/18:2
			PC 15:1_18:1	403	PC 15:1/18:1	0.61
				445	PC 18:1/15:1	0.39
			PC 16:1_17:1	417	PC 16:1/17:1	0.29
				431	PC 17:1/16:1	0.71
PC 33:1	806	804	PC 15:0_18:1	405	PC 15:0/18:1	0.91
				445	PC 18:1/15:0	0.09
			PC 16:0_17:1	419	PC 16:0/17:1	0.37
				431	PC 17:1/16:0	0.63
PC 33:0	808	-	PC 15:0_18:0	405	PC 15:0/18:0	0.56
				447	PC 18:0/15:0	0.44
			PC 16:0_17:0	419	PC 16:0/17:0	0.73
				433	PC 17:0/16:0	0.27
PC 34:3	816	814	PC 16:1_18:2	417	PC 16:1/18:2	0.57
				443	PC 18:2/16:1	0.43
			PC 16:0_18:3	419	PC 16:0/18:3	0.83
				441	PC 18:3/16:0	0.17
PC 34:2	818	816	PC 16:0_18:2	419	PC 16:0/18:2	0.85
				443	PC 18:2/16:0	0.15
			PC 16:1_18:1	417	PC 16:1/18:1	0.59
				445	PC 18:1/16:1	0.41
PC 34:1	820	818	PC 16:0_18:1	419	PC 16:0/18:1	0.77
				445	PC 18:1/16:0	0.23
PC 34:0	822	-	PC 16:0_18:0	419	PC 16:0/18:0	0.28
				447	PC 18:0/16:0	0.72
PC 35:5	826	824
PC 35:4	828	826
PC 35:3	830	828
PC 35:2	832	830	PC 16:0_19:2	419	PC 16:0/19:2	1
			PC 17:1_18:1	431	PC 17:1/18:1	0.78
				445	PC 18:1/17:1	0.22
			PC 17:0_18:2	433	PC 17:0/18:2	0.9
				443	PC 18:2/17:0	0.1
PC 35:1	834	832	PC 16:0_19:1	419	PC 16:0/19:1	0.63
				459	PC 19:1/16:0	0.37
			PC 17:1_18:0	447	PC 18:0/17:1	1
			PC 17:0_18:1	433	PC 17:0/18:1	0.7
				445	PC 18:1/17:0	0.3
PC 35:0	836	-	PC 16:0_19:0	419	PC 16:0/19:0	0.48
				461	PC 19:0/16:0	0.52
			PC 17:0_18:0	447	PC 18:0/17:0	0.82
				433	PC 17:0/18:0	0.18
PC 36:5	840	838
PC 36:4	842	840	PC 16:0_20:4	419	PC 16:0/20:4	0.92
				467	PC 20:4/16:0	0.08
			PC 18:2_18:2	443	PC 18:2/18:2	1
PC 36:3	844	842	PC 16:0_20:3	419	PC 16:0/20:3	1
			PC 18:1_18:2	445	PC 18:1/18:2	0.79
				443	PC 18:2/18:1	0.21
PC 36:2	846	844	PC 16:0_20:2	419	PC 16:0/20:2	1
			PC 18:0_18:2	447	PC 18:0/18:2	1
			PC 18:1_18:1	445	PC 18:1/18:1	1
PC 36:1	848	846	PC 18:0_18:1	447	PC 18:0/18:1
			PC 16:0_20:1	419	PC 16:0/20:1	0.33
				473	PC 20:1/16:0	0.67
PC 36:0	850	-	PC 18:0_18:0	447	PC 18:0/18:0	1
PC 37:6	852	820
PC 37:5	854	852
PC 37:4	856	854
PC 37:3	858	856
PC 37:2	860	858	PC 17:0_20:2	433	PC 17:0/20:2	1
			PC 19:0_18:2	461	PC 19:0/18:2	1
			PC 19:1_18:1	459	PC 19:1/18:1	0.82
				445	PC 18:1/19:1	0.18
PC 37:1	862	860	PC 18:1_19:0	461	PC 19:0/18:1
				445	PC 18:1/19:0
			PC 18:0_19:1	447	PC 18:0/19:1	1
PC 38:6	866	864	PC 16:0_22:6	419	PC 16:0/22:6	1
			PC 18:2_20:4	443	PC 18:2/20:4	1
PC 38:5	868	866	PC 16:0_22:5	419	PC 16:0/22:5	1
			PC 18:1_20:4	445	PC 18:1/20:4	1
PC 38:4	870	868	PC 16:0_22:4	419	PC 16:0/22:4	1
			PC 18:0_20:4	447	PC 18:0/20:4	1
PC 38:3	872	870	PC 18:0_20:3	447	PC 18:0/20:3	1
PC 38:2	874	872	PC 18:0_20:2	447	PC 18:0/20:2	1
PC 38:0	878	-
PC 40:7	892	890
PC 40:6	894	892	PC 18:0_22:6	447	PC 18:0/22:6	1
			PC 20:2_20:4	471	PC 18:1/22:5	1
PC 40:5	896	894	PC 18:0_22:5	447	PC 18:0/22:5	1
			PC 18:1_22:4	445	PC 18:1/22:4	1
			PC 20:1_20:4	473	PC 20:1/20:4	1
PC 40:4	898	896	PC 18:0_22:4	447	PC 18:0/22:4	1
PC 40:3	900	898
